# Supplementary material for: Supramolecular polyplexes from Janus peptide nucleic acids (bm-PNA-G5): self-assembled bm-PNA G-quadruplex and its tetraduplex with DNA
Source: Royal Society of Chemistry journal article supplement (doi:10.1039/d4ob00968a), 2024-01-01
Supplement: d4ob00968a1.pdf [file d4ob00968a1.pdf]

## Supporting Information

### Supramolecular Polyplexes from Janus Peptide Nucleic Acids (*bm*-PNA-G5): Self assembled *bm*-PNA G-Quadruplex and its Tetraduplex with DNA

Iranna Annappa Todkari,<sup>a,b</sup> Preeti Chaudhary,<sup>a</sup> Mahesh J Kulkarni,<sup>d</sup> and Krishna N.

Ganesh<sup>\*a,b,c</sup>

a. Department of Chemistry, Indian Institute of Science Education and Research (IISER) Pune, Dr Homi Bhabha Road, Pune 411008. India

b. Department of Chemistry, Indian Institute of Science Education and Research (IISER) Tirupati, Karkambadi Road, Tirupati 517507, India

c. New Chemistry Unit, Jawaharlal Nehru Center for Advanced Scientific Research (JNCASR), Jakkur, Bengaluru 560064, India.

d. Biochemical Sciences division, CSIR-National Chemical Laboratory, Pashan Road, Pune 411008, India

\*To whom correspondence should be addressed: kn.ganesh@jncasr.ac.in

| Entry | Content                                                           | Page No |
|-------|-------------------------------------------------------------------|---------|
| 1.    | General procedures                                                | 3       |
| 2.    | Synthesis of C/T <i>bm</i> -PNA monomers and N9-propargyl guanine | 4       |
| 3     | Solid phase synthesis of <i>bm</i> -PNA-G <sub>5</sub>            | 4       |
| 3a    | Solid phase synthesis of <i>iso</i> -PNA-G <sub>5</sub>           | 5       |
| 3b    | Solid phase synthesis of <i>bm</i> -PNA-G <sub>5</sub> -Cf        | 6       |
| 3c    | Solid phase synthesis of <i>bm</i> -PNA-G <sub>5</sub> -Cy3       | 7       |
| 3d    | Solid phase synthesis of <i>aeg</i> -PNA-G <sub>5</sub> -Cf       | 8       |

|        |                                                                                   |       |
|--------|-----------------------------------------------------------------------------------|-------|
| 3e     | Solid phase synthesis of mixed- <i>aeg</i> -PNA-Cf                                | 9     |
| 4      | HPLC chromatograms and MALDI-TOF of PNA oligomers                                 | 10    |
| 4a     | HPLC and MALDI-TOF profile of <i>aeg</i> -PNA-G5 oligomer                         | 10    |
| 4b     | HPLC and MALDI-TOF profile of <i>iso</i> -PNA-G5 and <i>bm</i> -PNA-G5 oligomer   | 10    |
| 4c 4d, | HPLC and MALDI-TOF profile of mixed- <i>aeg</i> -PNA and <i>bm</i> -PNA-Cf        | 11    |
| 4e 4f  | HPLC and MALDI-TOF profile of <i>bm</i> -PNA-G <sub>5</sub> -Cy3                  | 12    |
| 4g, 4h | HPLC and MALDI-TOF profile of <i>aeg</i> -PNA-G5-Cf and mixed- <i>aeg</i> -PNA-Cf | 13    |
| 5      | MALDI-TOF analysis table of PNA oligomers                                         | 14    |
| 6      | <i>cDNA</i> oligomers used for duplex formation                                   | 15    |
| 7      | UV- <i>T<sub>m</sub></i> profile of PNA oligomers at 260 nm                       | 15    |
| 8      | Full LC profile of <i>bm</i> -PNA-G5 tetraplex                                    | 15    |
| 9      | NIH-3T3 cellular uptake of PNA variants                                           | 16    |
| 10     | NMR and HRMS Spectra                                                              | 17-19 |
| 11     | References                                                                        | 20    |

**1.0 General procedures:** All chemicals used for reactions were analytical and laboratory grade. For each reaction, the solvents used were dried or distilled. Reactions were monitored by thin-layer chromatography (TLC). TLC was carried out on pre-coated silica gel GF<sub>254</sub> sheets (Merck 5554). TLC plates were visualized under an UV lamp by spraying with ninhydrin solution, followed by heating of the plate. Column chromatographic separations were performed using silica gel (60-120 or 100-200 mesh).

All <sup>1</sup>H and <sup>13</sup>C NMR were recorded using Bruker AC-400 (400 MHz) or JEOL 400 MHz NMR spectrometers in CDCl<sub>3</sub> and DMSO-d<sub>6</sub>. Chemical shifts are reported in parts per million (ppm,  $\delta$  scale). UV-Visible spectrophotometry (Perkin Elmer Lambda 45 double beam UV-Vis spectrophotometer) data were collected for compound/peptide characterization. Mass spectra for reaction intermediates were obtained by HRMS and the integrity of PNA oligomers were analyzed by using MALDI-TOF-MS. PNA oligomers were purified by reverse phase HPLC system using a semipreparative Phenomenex C18 (10 X 250 mm) column. DNA oligonucleotides were obtained commercially from Integrated DNA Technologies (IDT). Reagents used in buffer preparation such as sodium cacodylate and salts potassium chloride were obtained from Sigma-Aldrich.

## 2.0 Synthesis of *bm*-PNA (C/T) monomers and N9-propargyl guanine:

The monomers *bm*-PNA-C **1** and *bm*-PNA-T **2** were synthesized, characterized and purified according to previously reported protocols.<sup>1</sup>

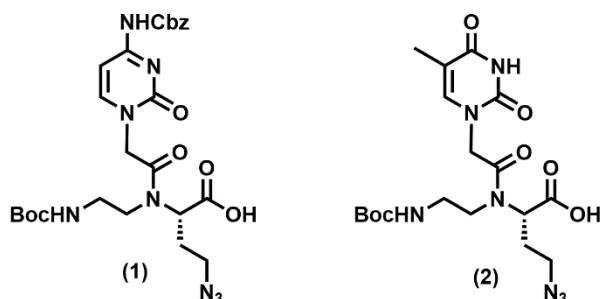

### Synthesis of N9-propargyl guanine

N9-Propargyl guanine synthesized according to standard literature protocols.<sup>2</sup>

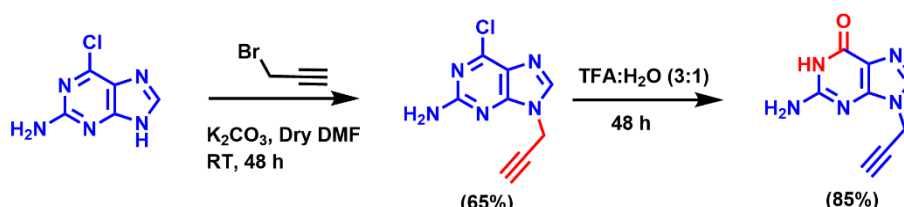

## 3. Solid phase syntheses of *bm*-PNA-G5 oligomer<sup>1</sup>

The synthesis of *bm*-PNA-G5 (C-GTCTTCA-N) oligomer was done from C terminus to N-terminus direction by solid phase synthesis using L-lysine derivatized MBHA functionalized resin (**3**) with 0.22 mmol/g loading. N-Boc group was deprotected with 50% TFA in DCM to get **4**, which was neutralised to get resin **5** with free amino group. This was then coupled with *aeg*-PNA-G monomer using HOBT/HATU as coupling agent to yield **6**. The deprotection - coupling cycle was repeated using *bm*-PNA-(C/T) monomers (**1** and **2**) in the order (TCTTC) as per desired sequence to give **7**. This was followed by last coupling with *aeg*-PNA-A monomer to yield resin bound *bm*-PNA oligomer **8** having five ethyl azide sidechains. In the subsequent step, a global click reaction of ethyl azido group on solid phase with N9-propynyl guanine provided MBHA-*bm*-PNA-G5 **9**, which was further subjected to reaction with TFA/TFMSA. This lead to free *bm*-PNA-G5 oligomer **10**.

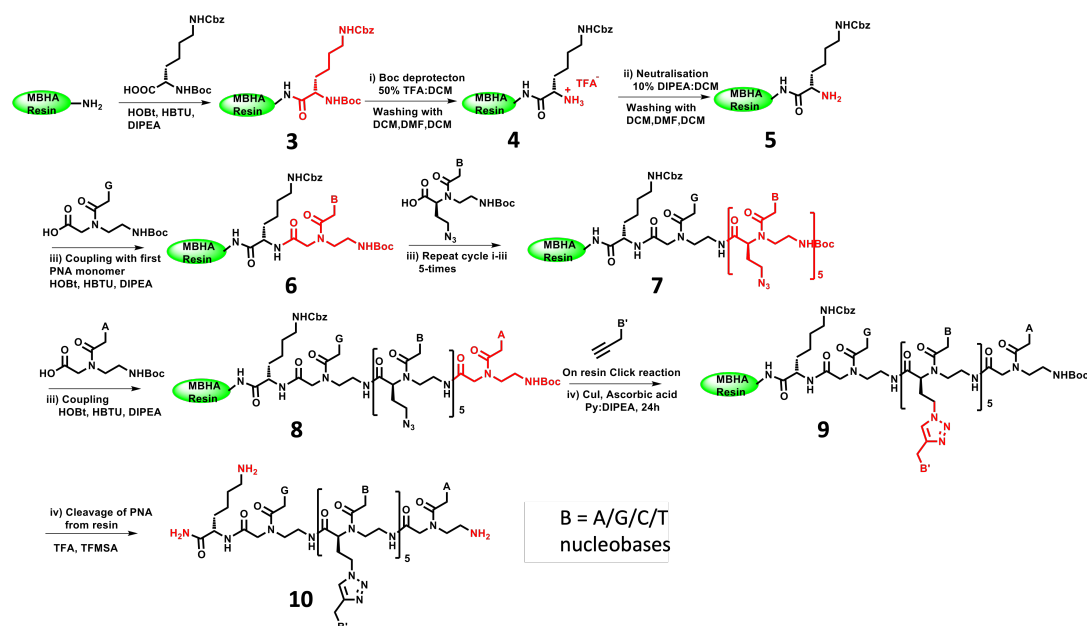

**Figure 1** Solid phase synthesis protocol of *bm*-PNA (N-ACTTCTG) by Boc strategy.

**3a. Solid phase synthesis of *iso*-PNA-G<sub>5</sub>:** This was done by a similar procedure as above, using appropriate *iso*-PNA monomers as reported previously.

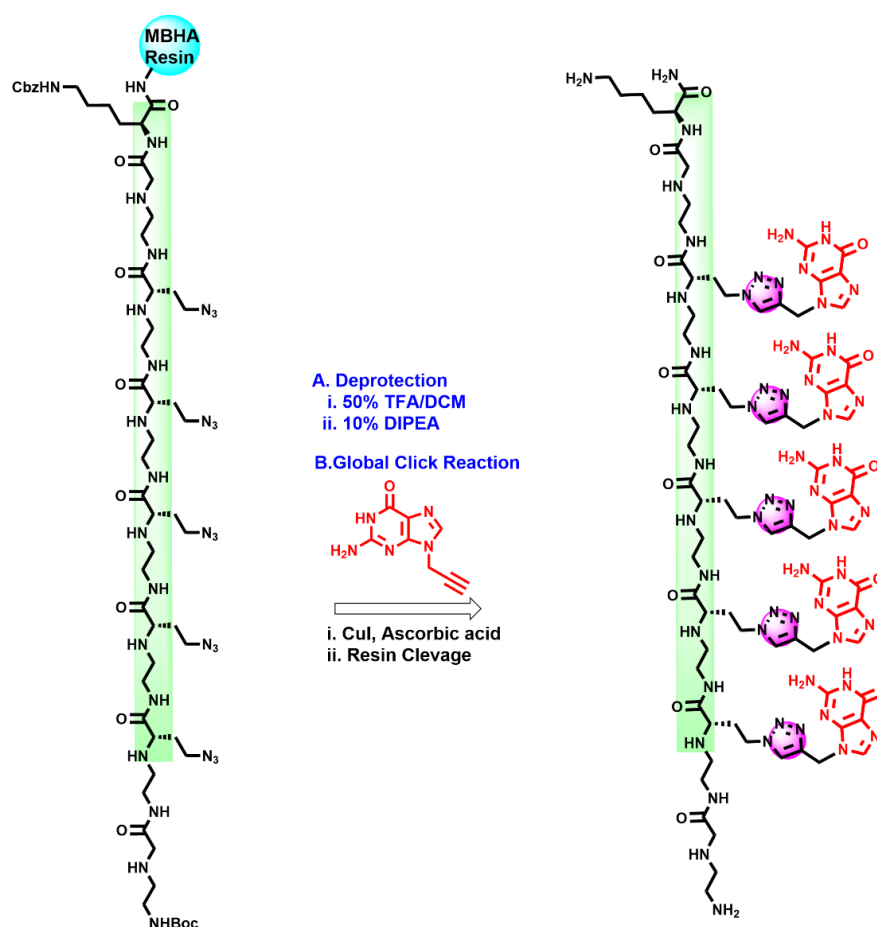

**3b. Solid phase synthesis of *bm*-PNA-G5-Cf:** The resin bound *bm*-PNA oligomer **9** was deprotected, followed by coupling with carboxy fluorescein or cyanine -3-carboxylic acid. The resulting conjugates were cleaved from the resin and deprotected to yield fluorescent *bm*-PNA-G5-Cf and *bm*-PNA-G5-Cy3 for experiments with FRET and cell uptake.

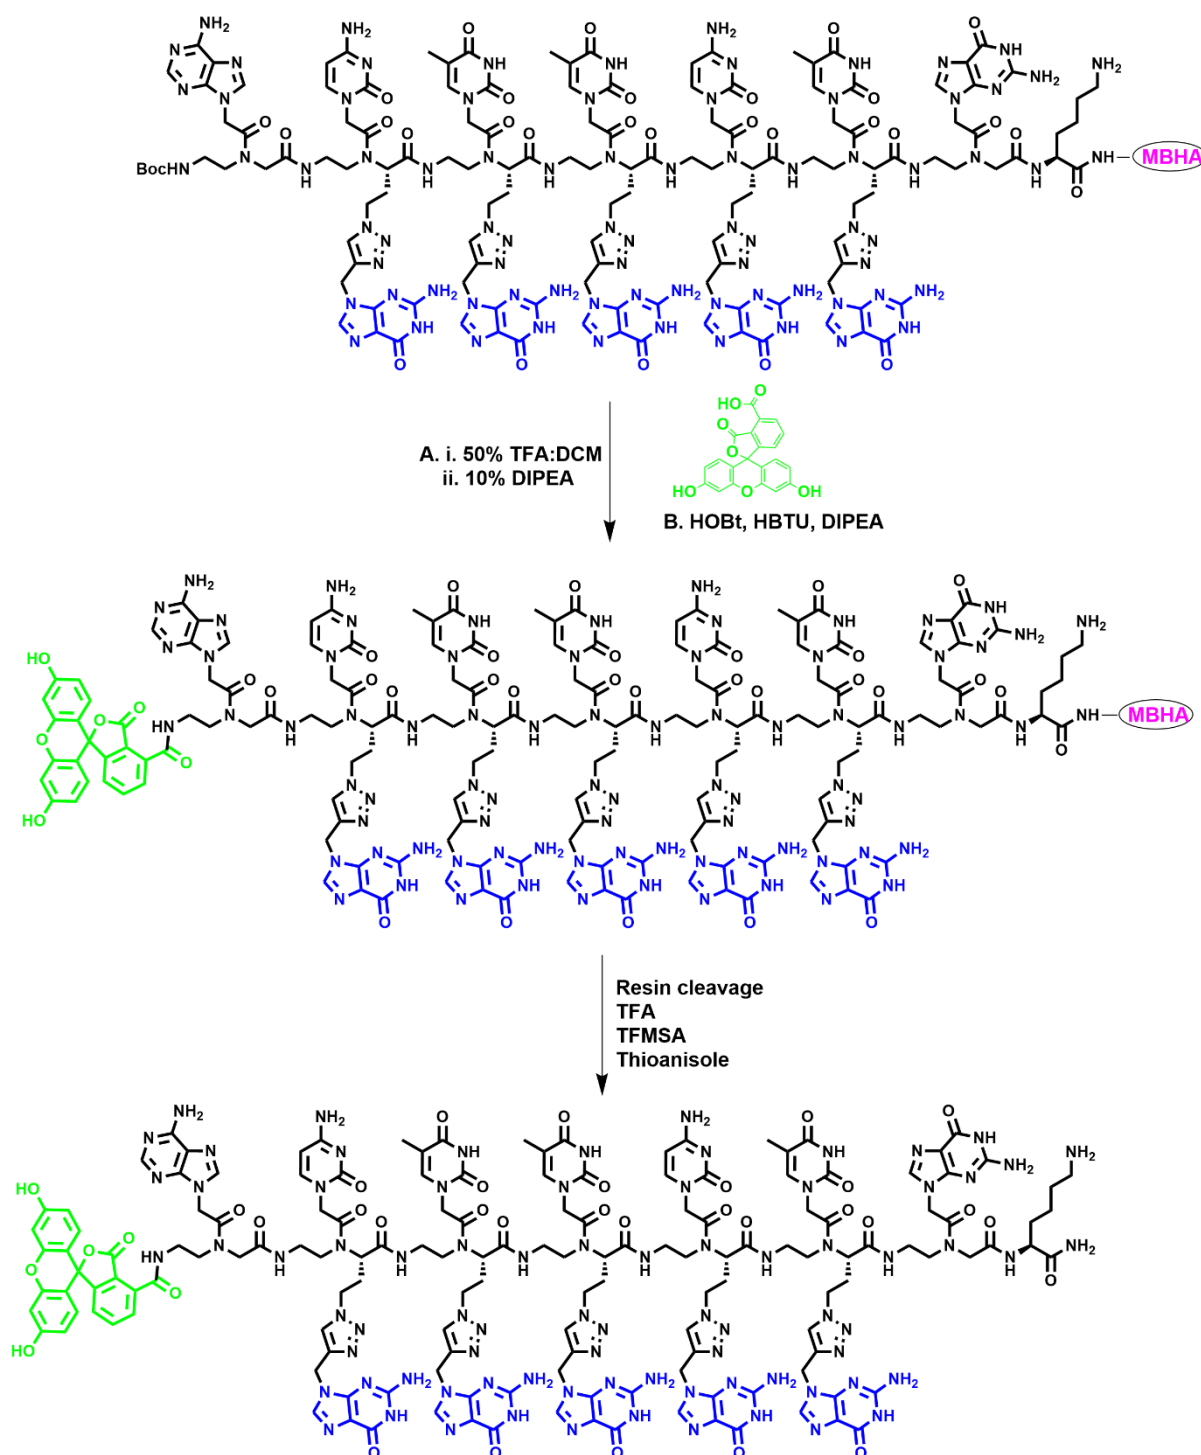

### 3c. Solid phase synthesis of *bm*-PNA-G5-Cy3

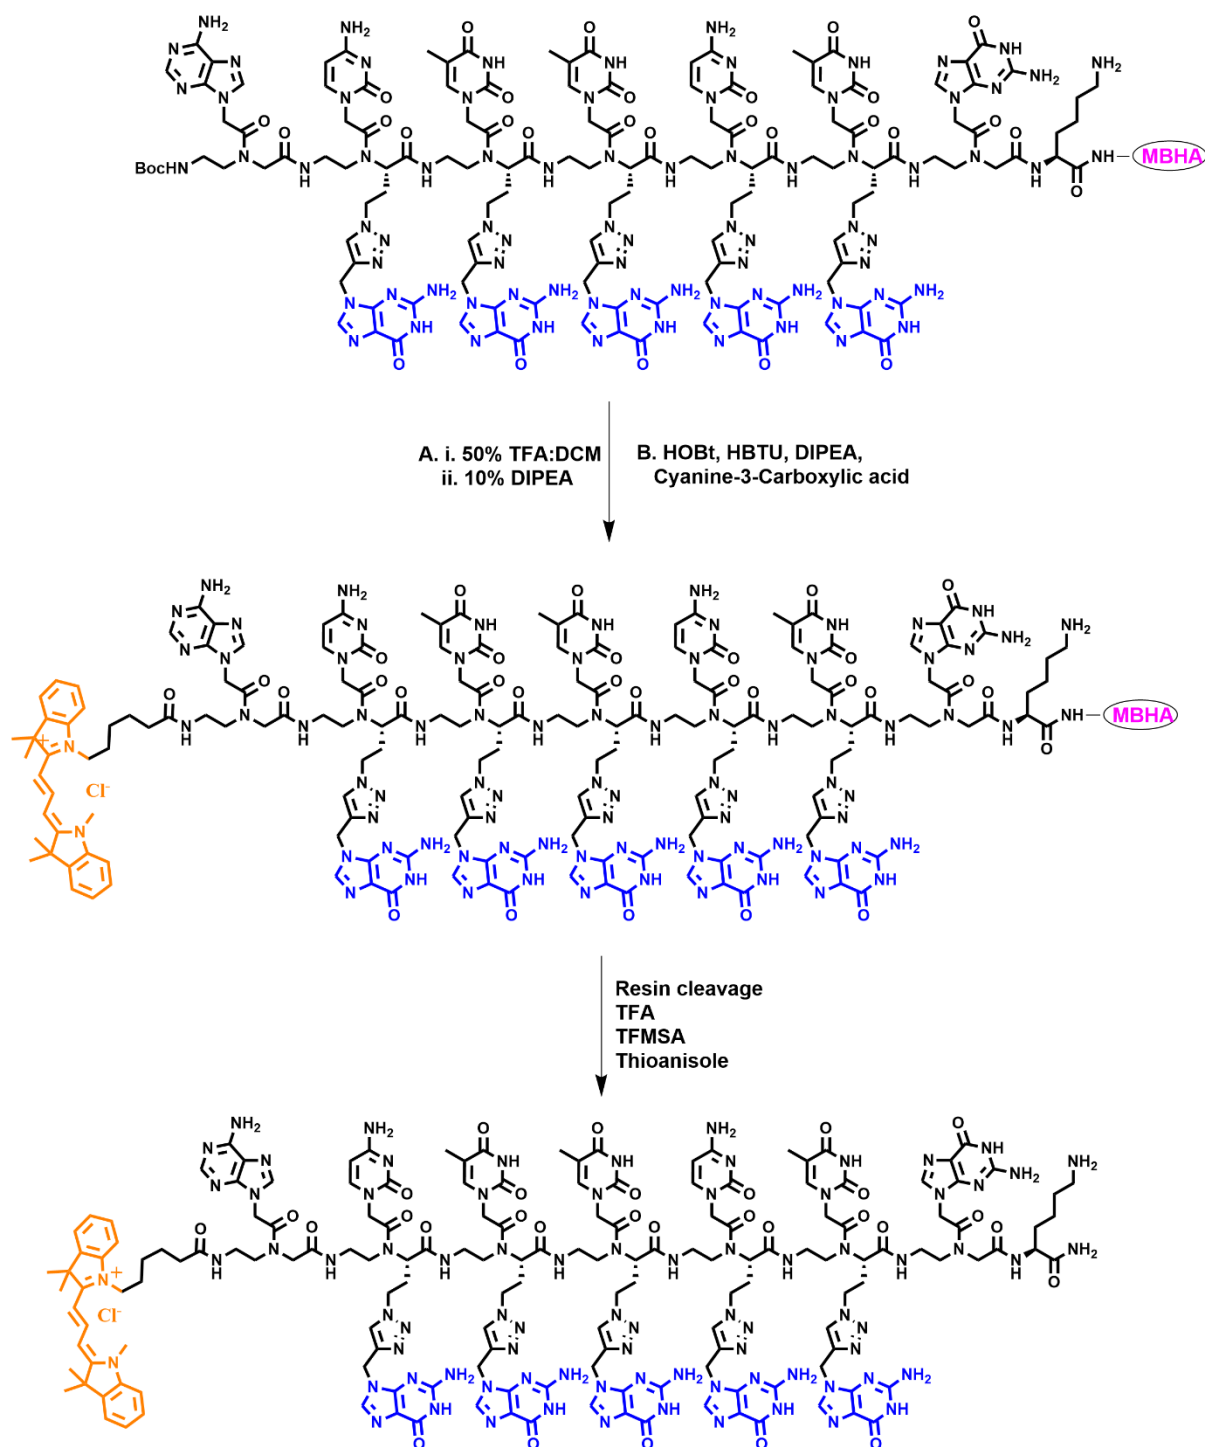

**3d. Solid phase synthesis of *aeg*-PNA-G5-Cf :** This was prepared by a similar procedure as above using *aeg*-PNA-G5

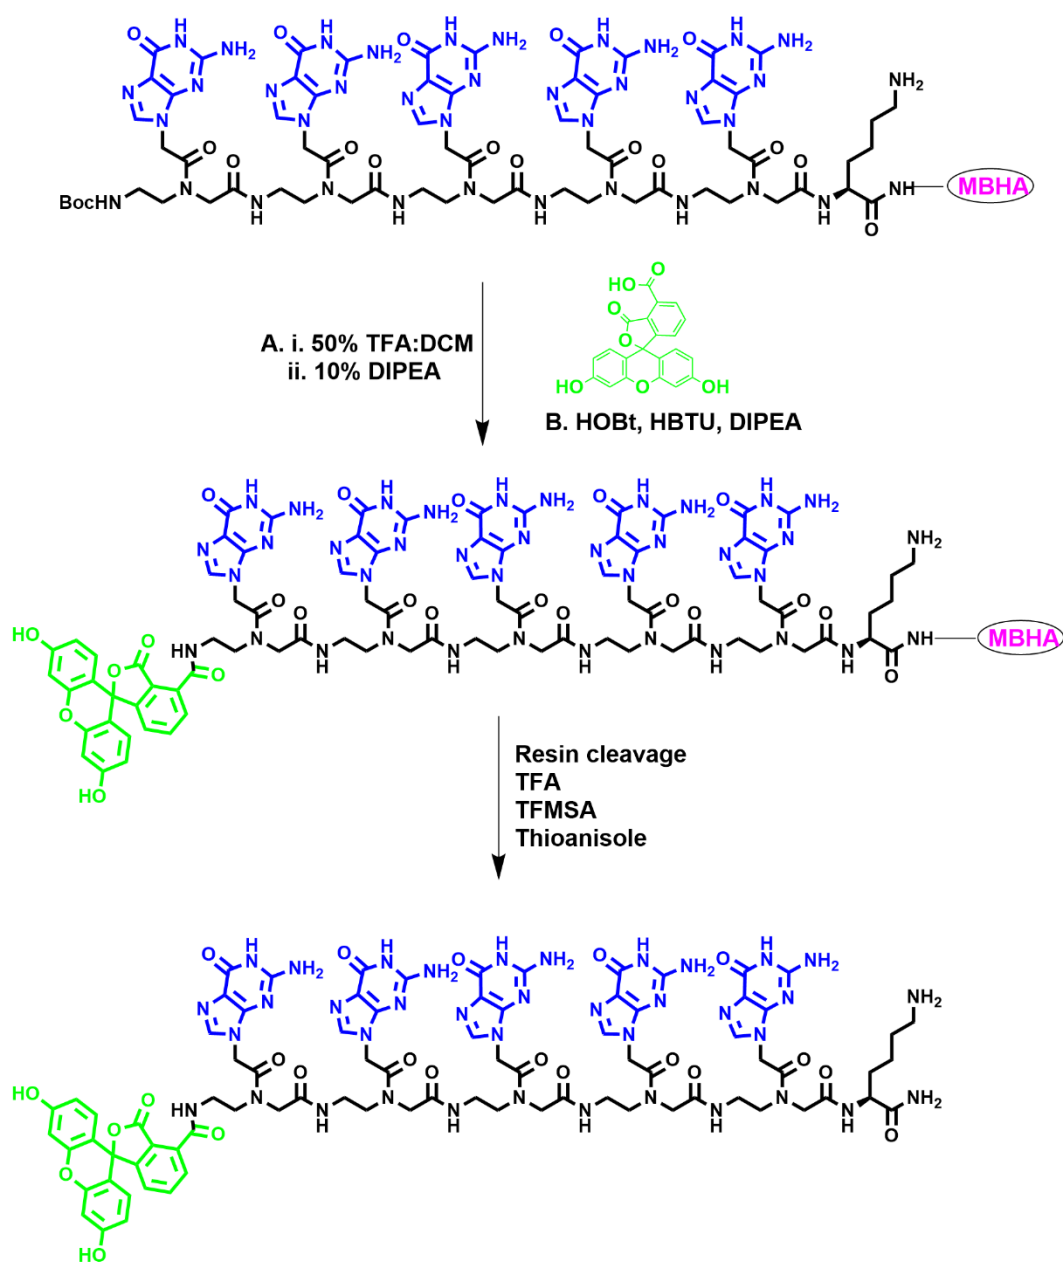

**3f. Solid phase synthesis of mix-aeg-PNA-Cf:** This was prepared by a similar procedure as above using mix-aeg-PNA-G5.

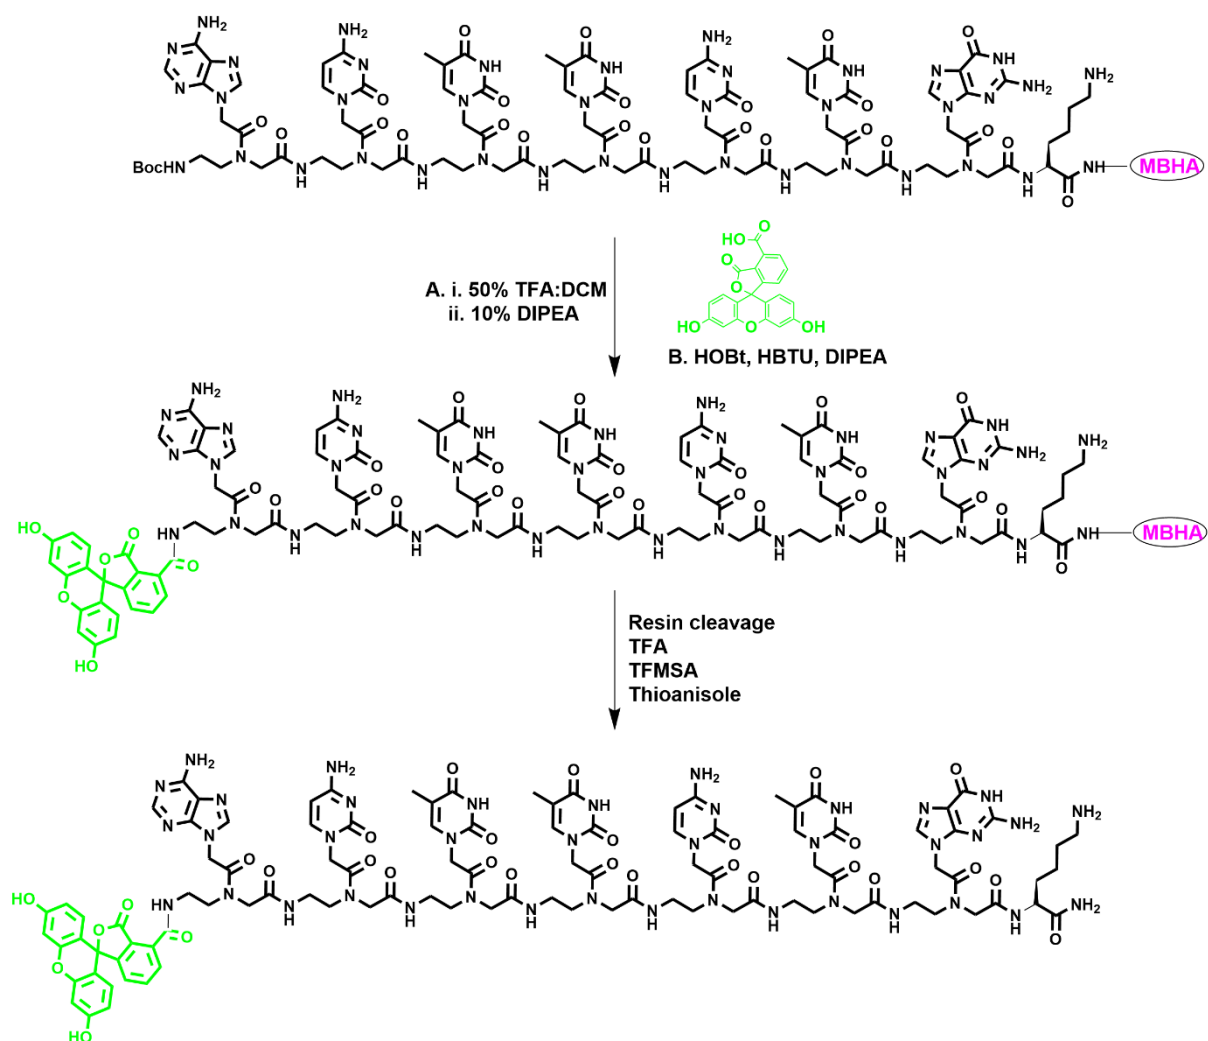

#### 4.0 RP-HPLC Chromatograms and MALDI-TOF of PNA Oligomers

The purification of PNA oligomers done by RP-HPLC and characterization by MALDI-TOF

##### 4a. RP-HPLC and MALDI of *aeg*-PNA-G<sub>5</sub>

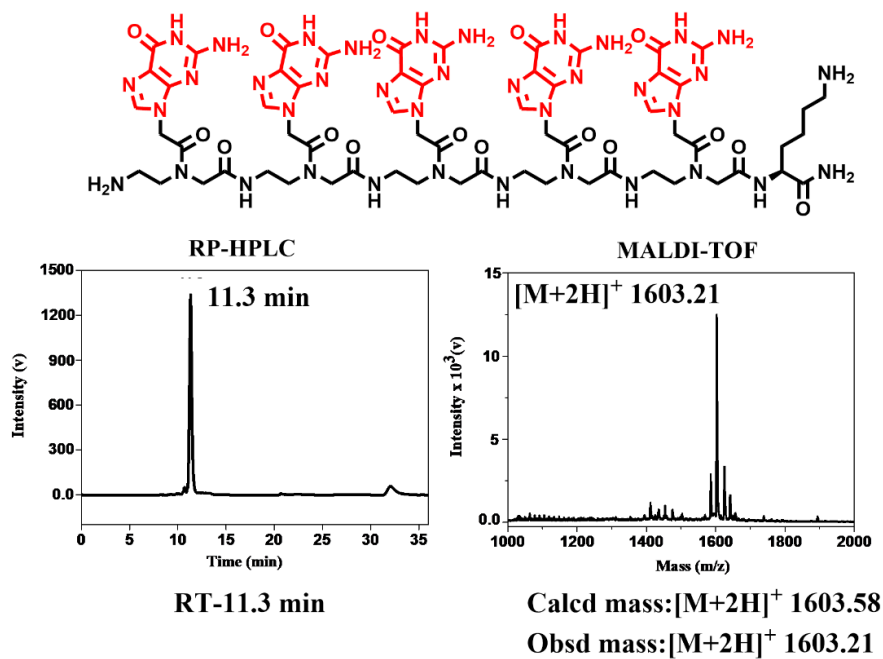

##### 4b. RP-HPLC and MALDI of *iso*-PNA-G<sub>5</sub>

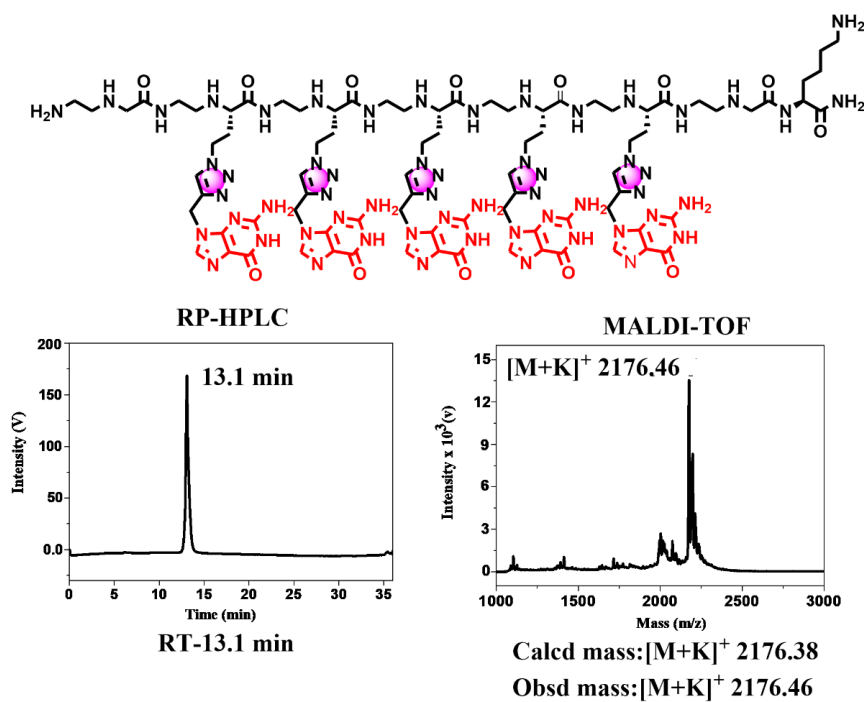

#### 4c. RP-HPLC and MALDI of *bm*-PNA-G<sub>5</sub>

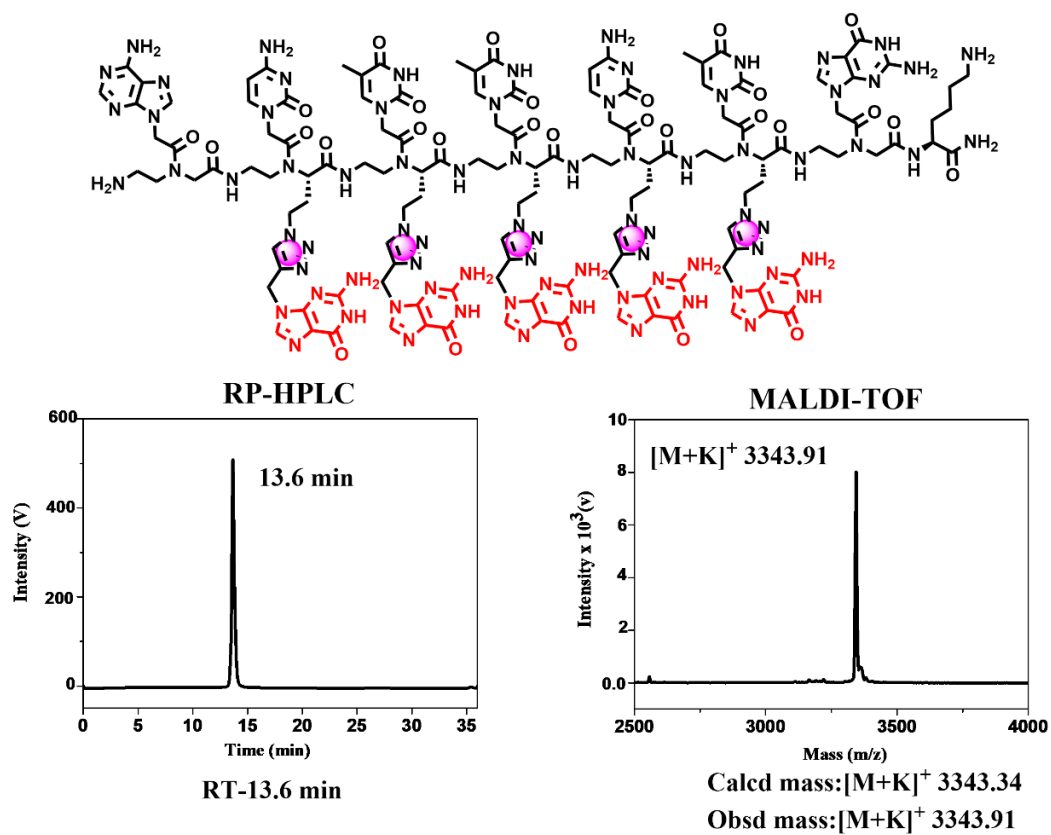

#### 4d. RP-HPLC and MALDI of mix-*aeg*-PNA

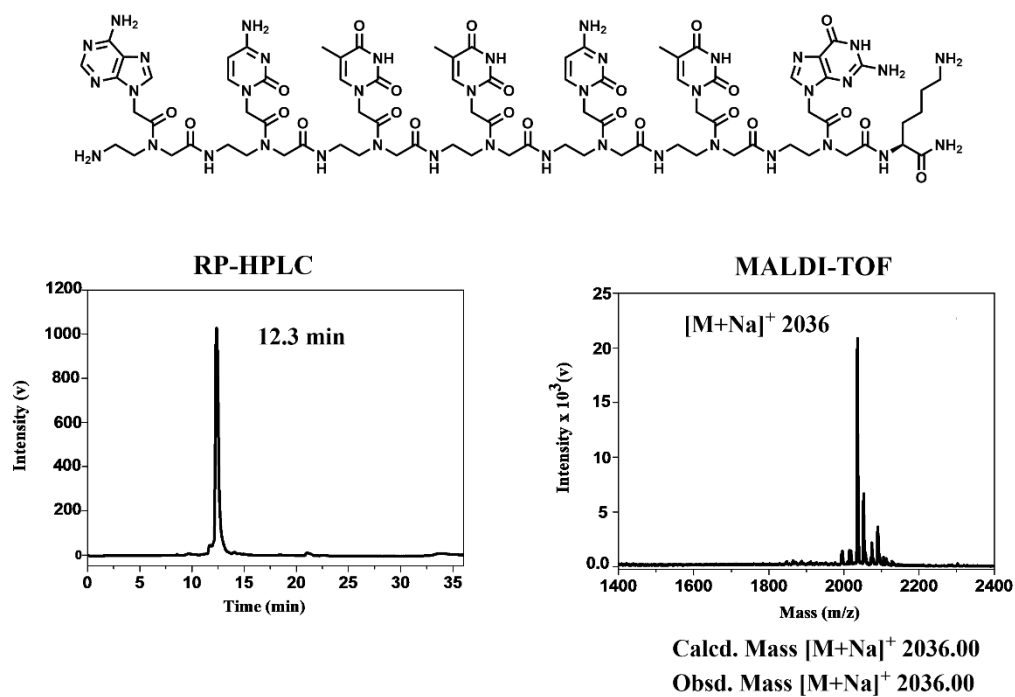

#### 4e. RP-HPLC and MALDI of *bm*-PNA-G<sub>5</sub>-Cf

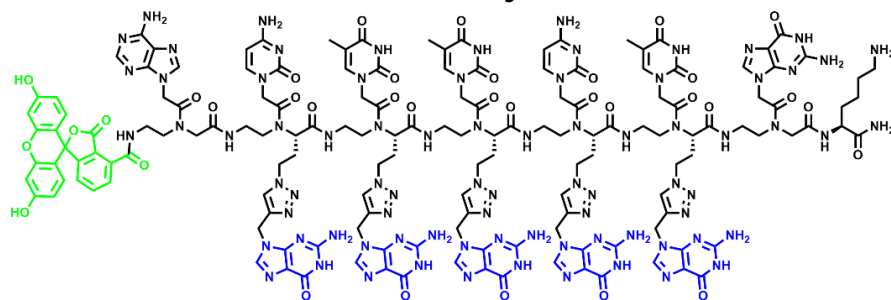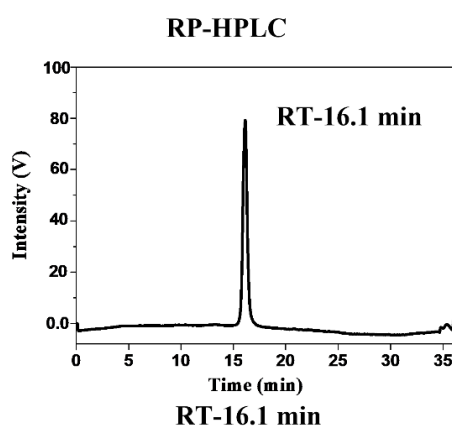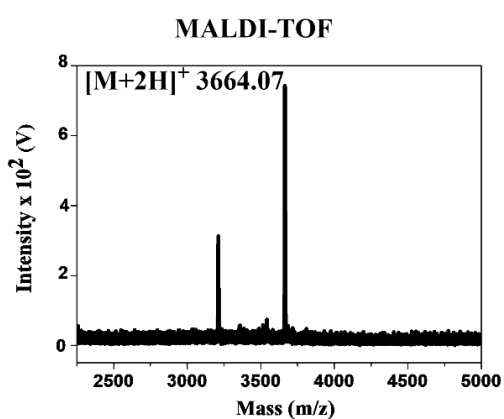

#### 4f. RP-HPLC and MALDI of *bm*-PNA-G<sub>5</sub>-Cy3

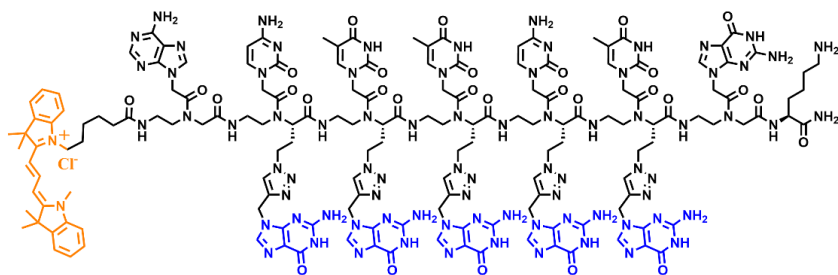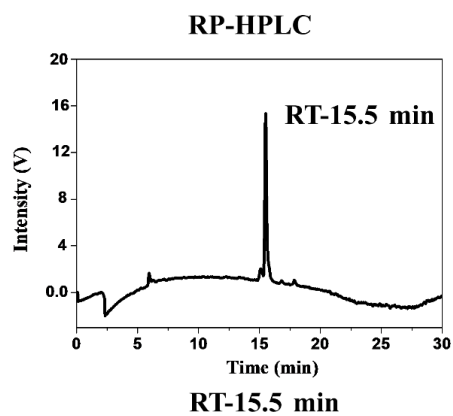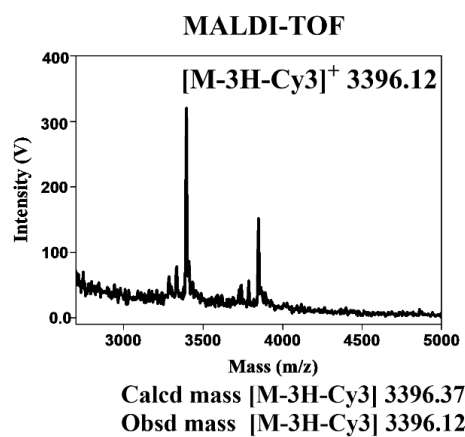

#### 4g. RP-HPLC and MALDI of *aeg*-PNA-G<sub>5</sub>-Cf

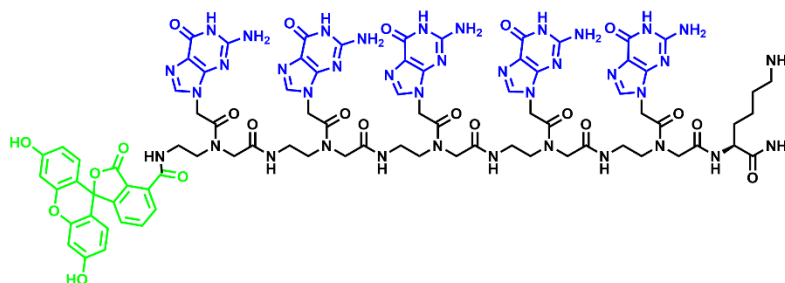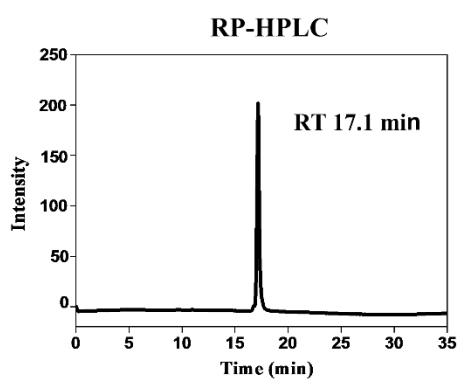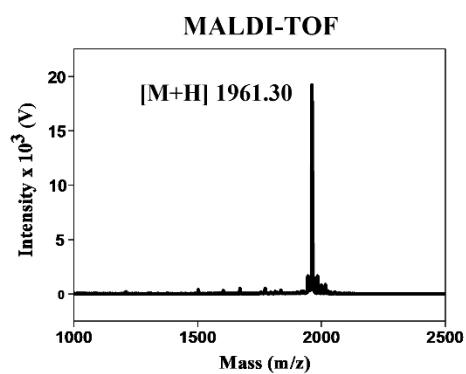

Calcd. Mass [M+H] 1960.87  
Obsd. Mass [M+H] 1961.30

#### 4h. RP-HPLC and MALDI of mix-*aeg*-PNA-Cf

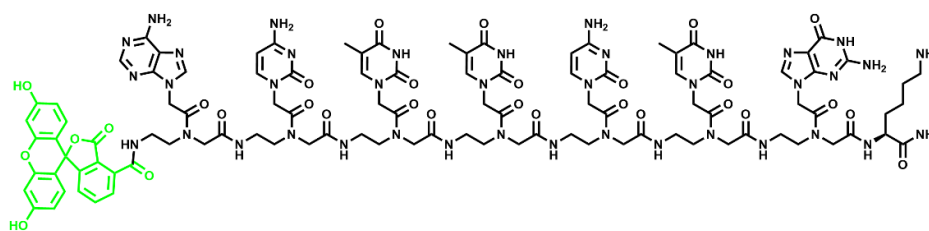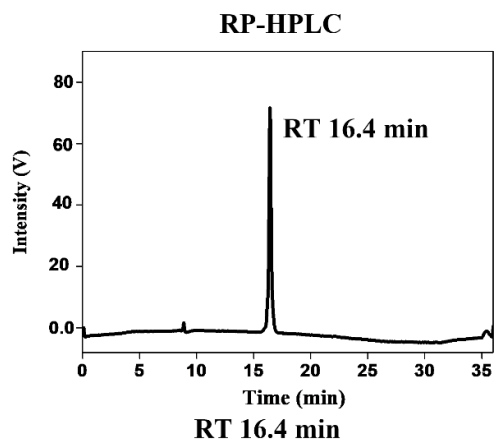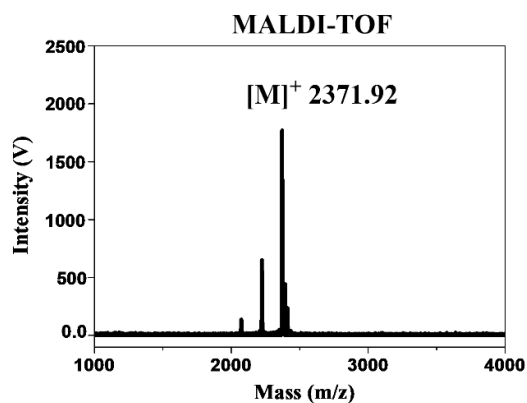

Calcd Mass [M]<sup>+</sup> 2371.32  
Obsd Mass [M]<sup>+</sup> 2371.92

**5. Table 1. MALDI-TOF analysis of PNA oligomers**

| <b>Entry</b> | <b>PNA</b>                         | <b>Mol. formulae</b>                                                | <b>Calcd. Mass</b>          | <b>Obsd. Mass</b>           |
|--------------|------------------------------------|---------------------------------------------------------------------|-----------------------------|-----------------------------|
| <b>1</b>     | <i>aeg</i> -PNA-G <sub>5</sub>     | C <sub>61</sub> H <sub>82</sub> N <sub>38</sub> O <sub>16</sub>     | [M+2H] <sup>+</sup> 1603.58 | [M+2H] <sup>+</sup> 1603.21 |
| <b>2</b>     | <i>iso</i> -PNA-G <sub>5</sub>     | C <sub>84</sub> H <sub>121</sub> KN <sub>57</sub> O <sub>13</sub>   | [M+K] <sup>+</sup> 2176.38  | [M+K] <sup>+</sup> 2176.46  |
| <b>3</b>     | <i>bm</i> -PNA-G <sub>5</sub>      | C <sub>131</sub> H <sub>159</sub> KN <sub>79</sub> O <sub>29</sub>  | [M+K] <sup>+</sup> 3343.34  | [M+K] <sup>+</sup> 3343.91  |
| <b>4</b>     | <i>mix-aeg</i> -PNA                | C <sub>81</sub> H <sub>109</sub> N <sub>39</sub> NaO <sub>24</sub>  | [M+Na] <sup>+</sup> 2036.00 | [M+Na] <sup>+</sup> 2036.00 |
| <b>5</b>     | <i>bm</i> -PNA-G <sub>5</sub> -Cf  | C <sub>152</sub> H <sub>171</sub> N <sub>79</sub> O <sub>35</sub>   | [M+2H] <sup>+</sup> 3664.56 | [M+2H] <sup>+</sup> 3664.07 |
| <b>6</b>     | <i>bm</i> -PNA-G <sub>5</sub> -Cy3 | C <sub>161</sub> H <sub>196</sub> ClN <sub>81</sub> O <sub>30</sub> | [M+2H] <sup>+</sup> 3664.56 | [M+2H] <sup>+</sup> 3664.56 |
| <b>7</b>     | <i>aeg</i> -PNA-G <sub>5</sub> -Cf | C <sub>82</sub> H <sub>91</sub> N <sub>38</sub> O <sub>22</sub>     | [M+H] <sup>+</sup> 1960.87  | [M+H] <sup>+</sup> 1961.30  |
| <b>8</b>     | <i>mix-aeg</i> -PNA-Cf             | C <sub>102</sub> H <sub>119</sub> N <sub>39</sub> O <sub>30</sub>   | [M] <sup>+</sup> 2371.92    | [M] <sup>+</sup> 2371.32    |

## 6. DNA oligonucleotides used for biophysical studies

| Entry | DNA   | Sequence (5' to 3') |
|-------|-------|---------------------|
| 1     | DNA 1 | CAGAAGT             |

## 7. UV- $T_m$ of PNA variants at 260 nm:

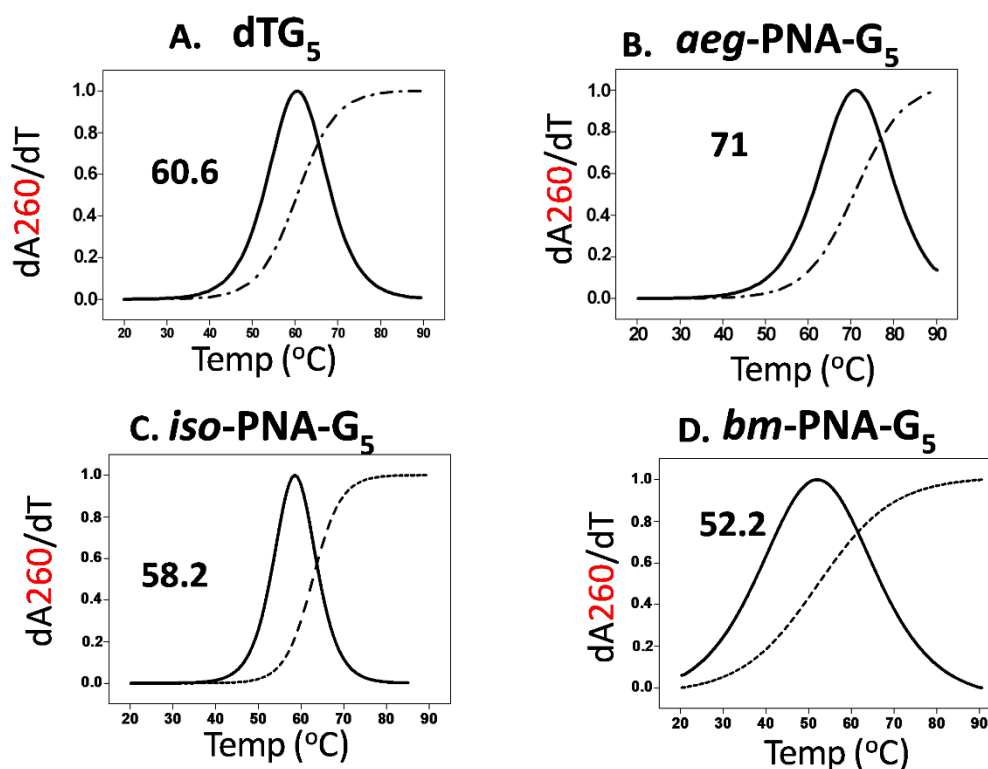

## 8. Full LC profile of bm-PNA-G5 tetraplex:

Retention time : 0.63 min

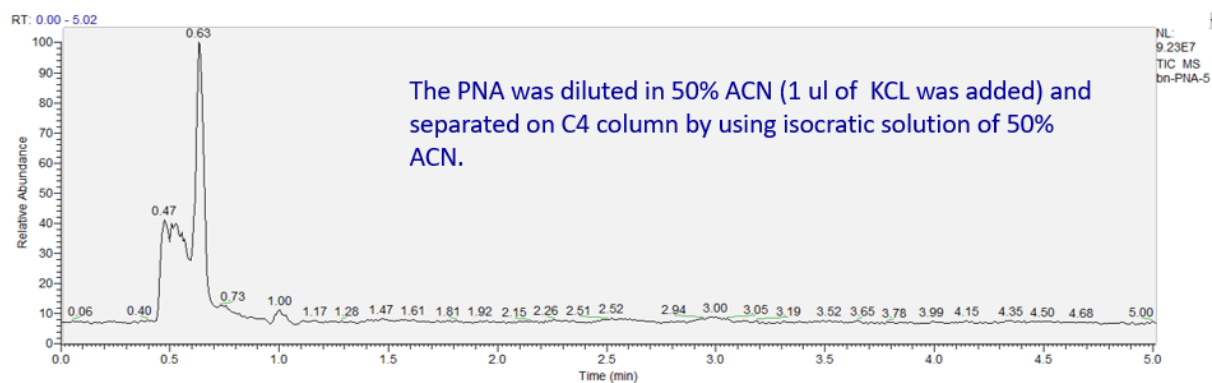

## 9 . NIH-3T3 cell\_24h uptake @4 $\mu$ M concentration of PNA

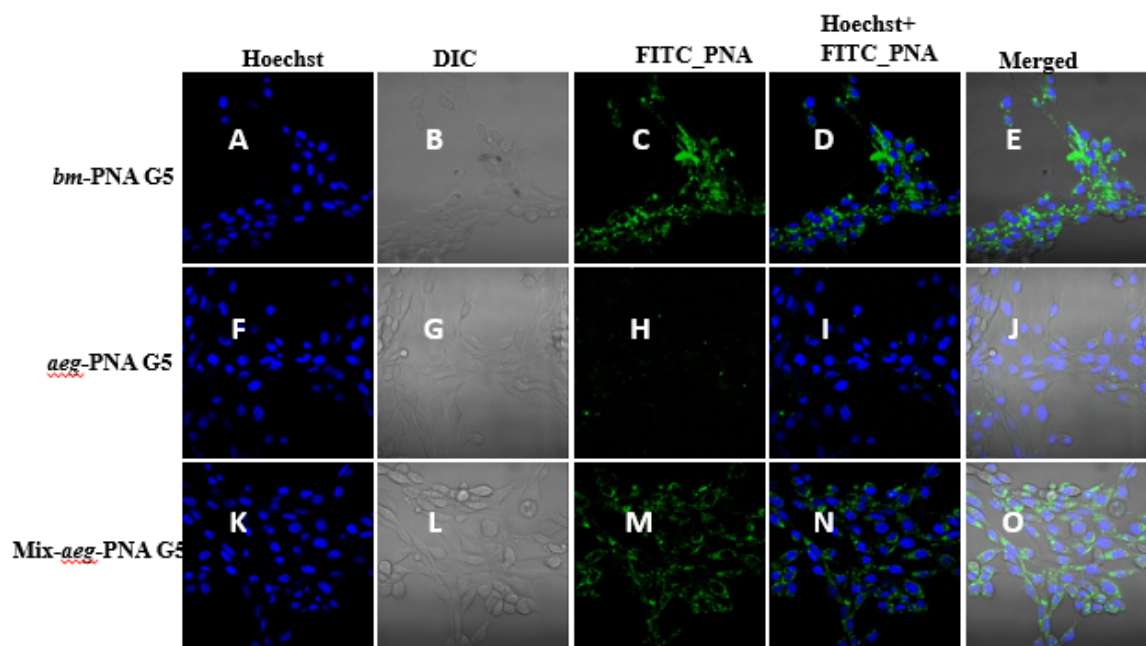

Confocal microscopy images of NIH-3T3 cells treated with (A-E) *bm*-PNA-G5-*Cf*, (F-J) *aeg*-PNA-G5-*Cf* and (K-O) mix-*aeg*-PNA-*Cf* (A), (F), and (K) are images of Hoechst (B), (G), and (L) show signals from DIC. (C), (H), and (M) show the images of *cf*-PNAs. (D), (I), and (N) show the images of Hoechst + PNAs-*Cf* and (E), (J), and (O) show the merged images.

## 10. NMR and HRMS spectra:

### <sup>1</sup>H NMR

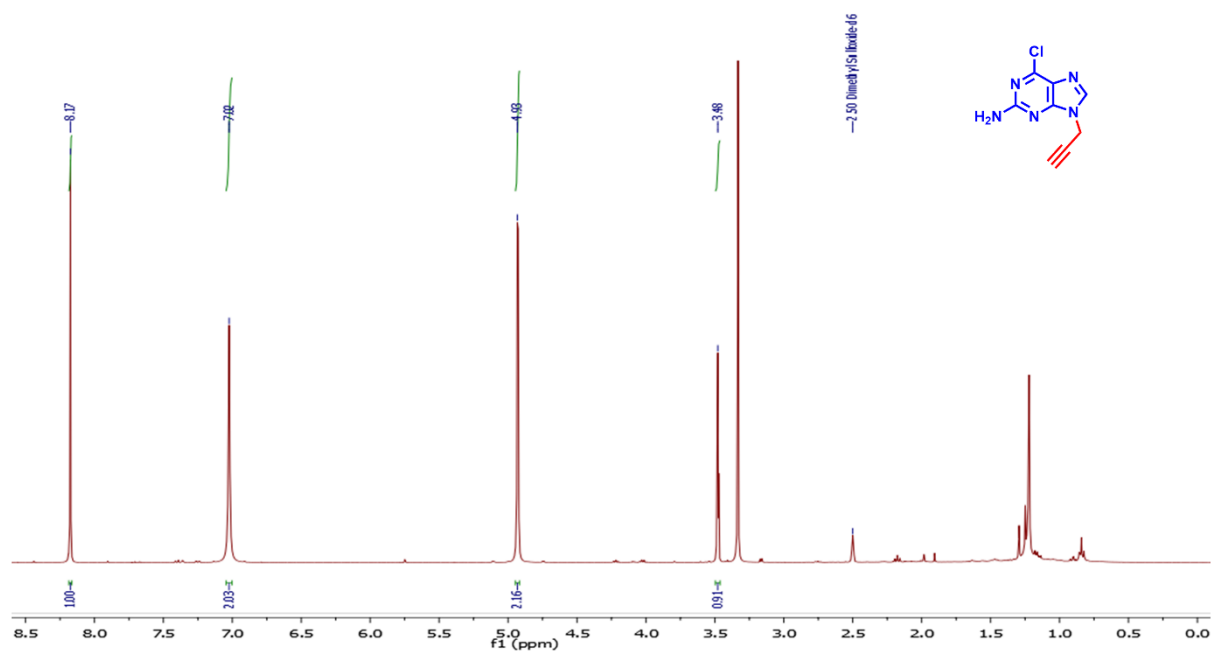

### <sup>13</sup>C NMR

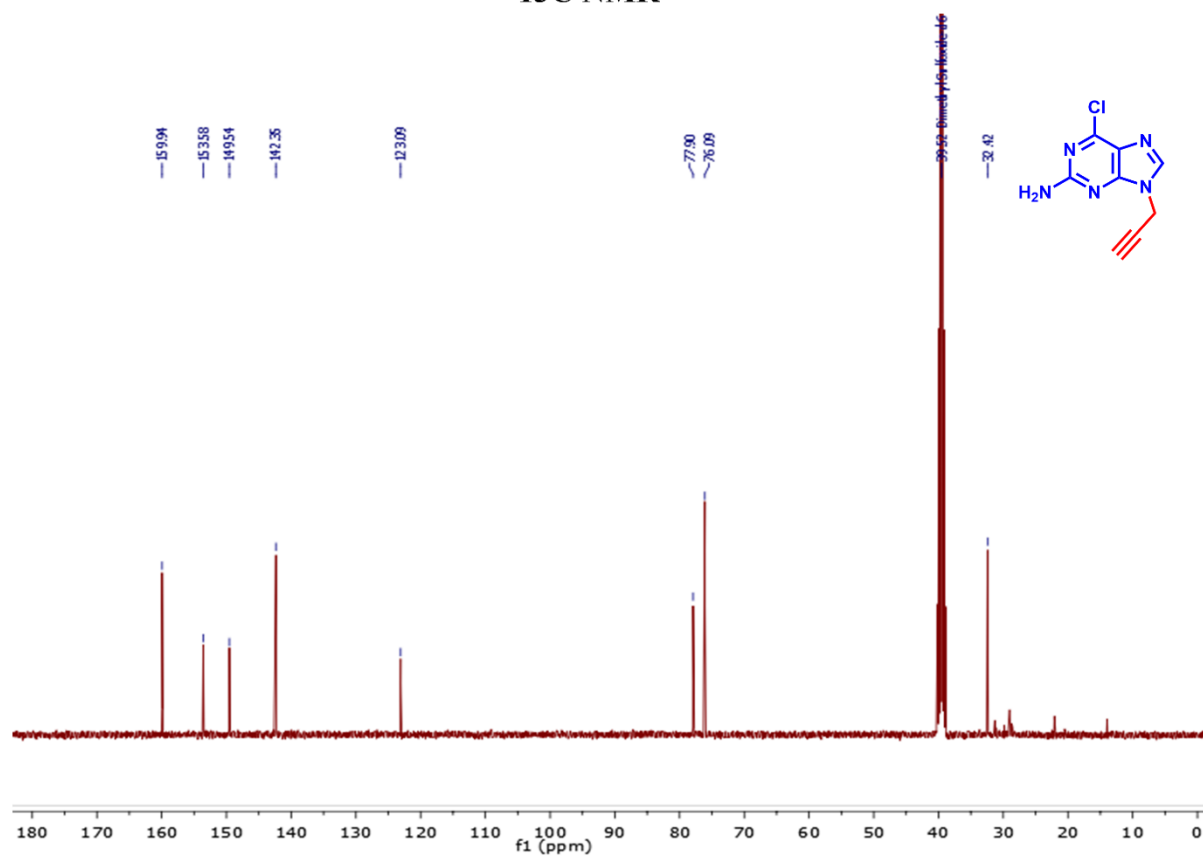

# **<sup>1</sup>H NMR**

20220117-it-03-69-a

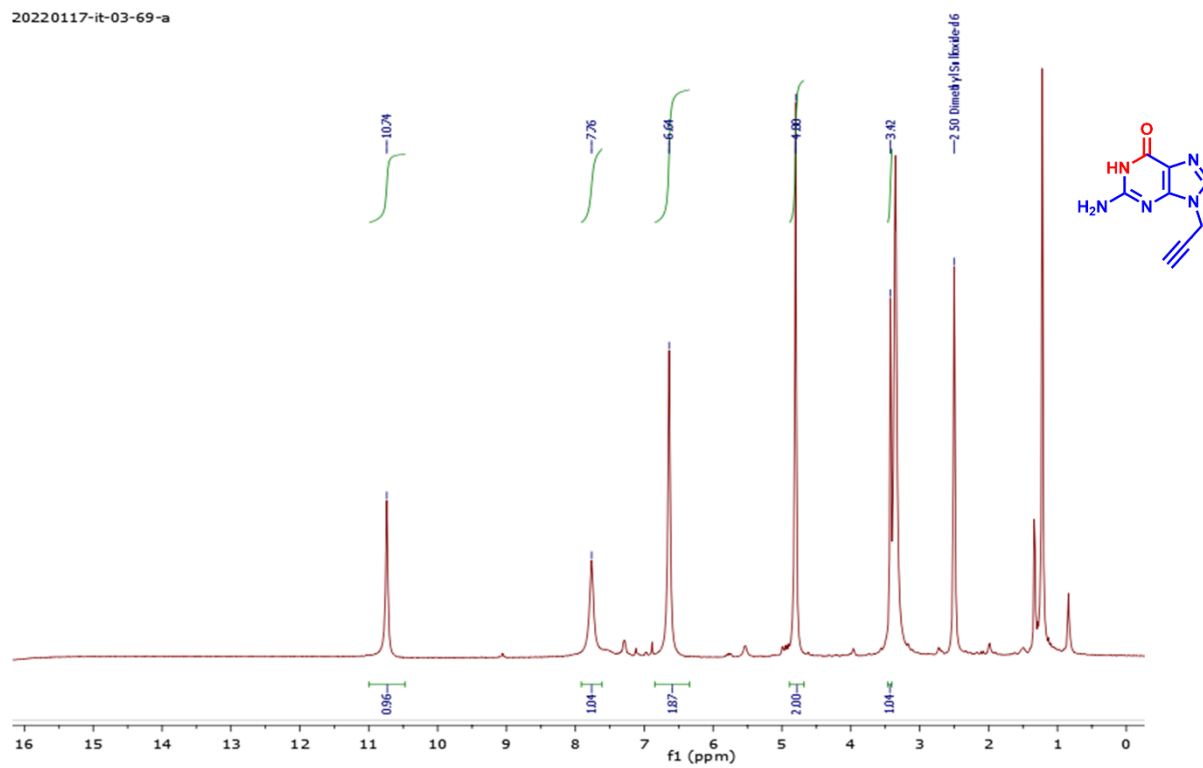

# **<sup>13</sup>C NMR**

20230123-it-03-69-b

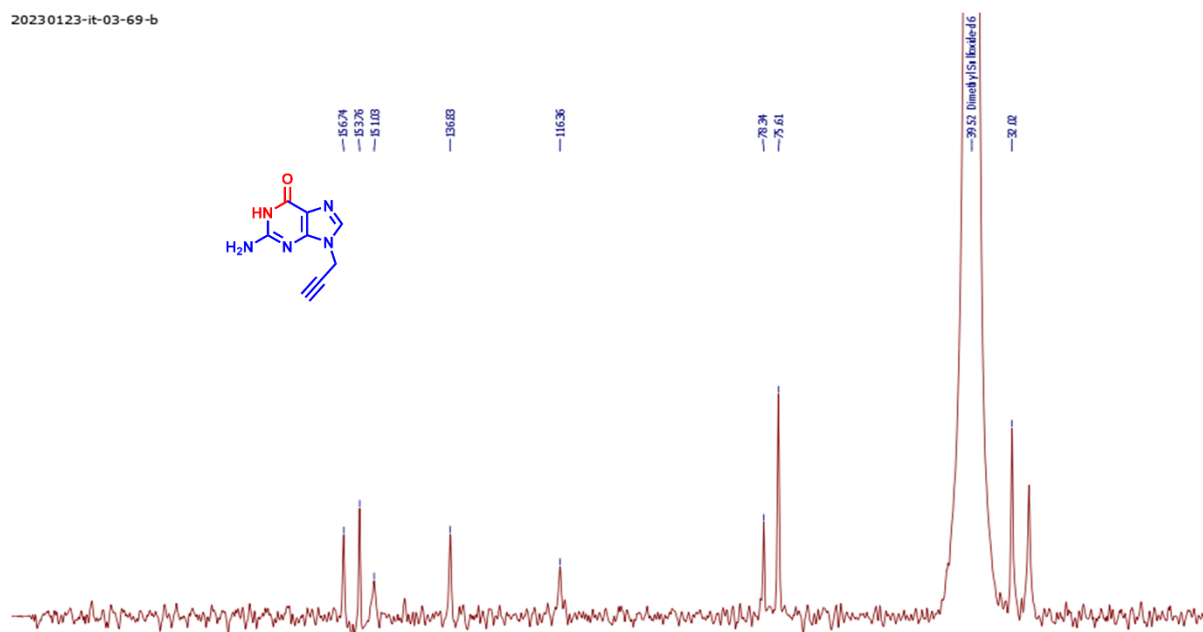

## HRMS

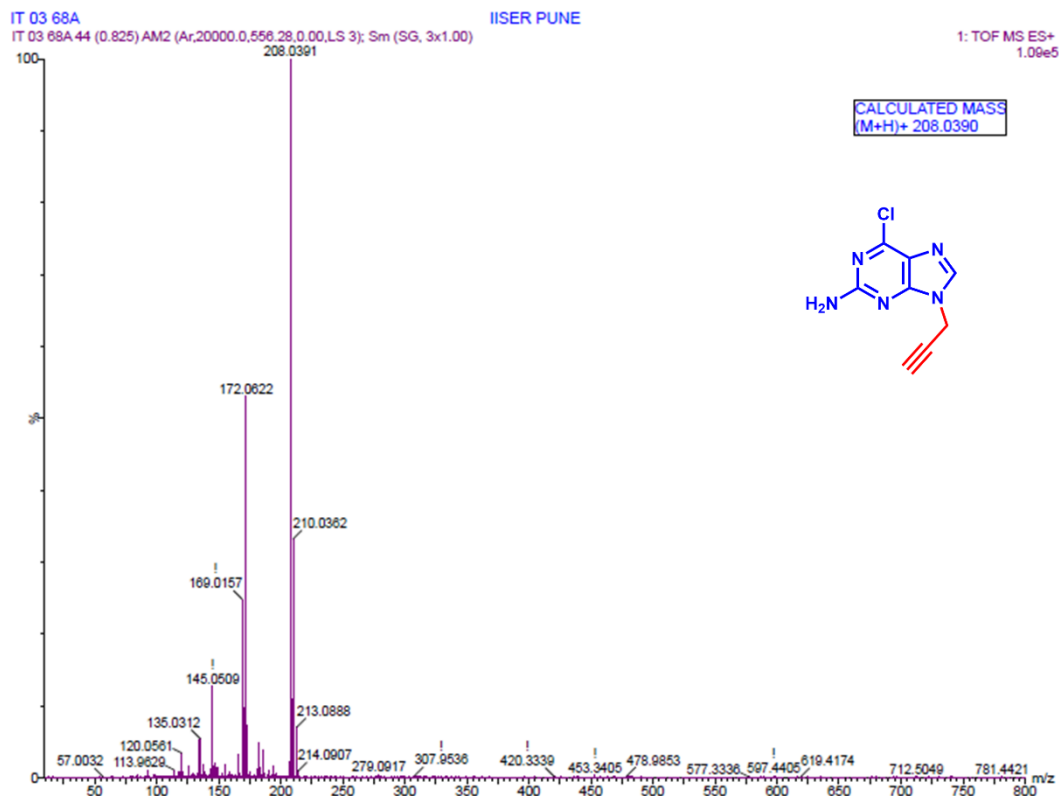

## HRMS

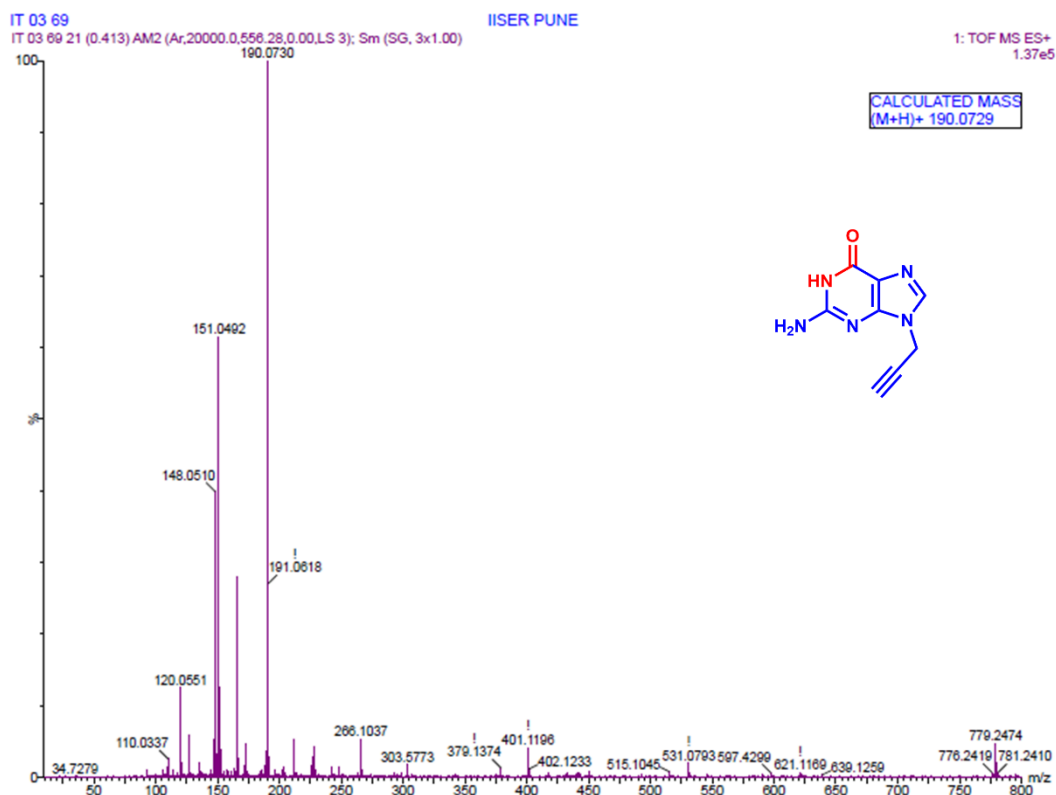

## 11. References

1. M. K. Gupta, B. R. Madhanagopal, D. Datta, K. N. Ganesh, *Org. Lett.* 2020, **22**, 5255.
2. N. Nagapradeep, S. Verma, *Chemical Commun.* 2011, **47**, 1755
